# Supplementary material for: Molecular mechanism of biased signaling at the kappa opioid receptor
Source: PubMed Central journal article supplement (PMC10008561; doi:10.1038/s41467-023-37041-7), 2023-03-11
Supplement: 41467_2023_37041_MOESM1_ESM.pdf [file 41467_2023_37041_MOESM1_ESM.pdf]

## Supplemental Materials

### Molecular mechanism of biased signaling at the kappa opioid receptor

Amal EI Daibani<sup>1,2</sup>, Joseph M. Paggi<sup>3</sup>, Kuglae Kim<sup>4,5</sup>, Yianni D. Laloudakis<sup>3</sup>, Petr Popov<sup>6</sup>, Sarah M. Bernhard<sup>1,2</sup>, Brian E. Krumm<sup>4</sup>, Reid H.J. Olsen<sup>4</sup>, Jeffrey Diberto<sup>4</sup>, F. Ivy Carroll<sup>7</sup>, Vsevolod Katritch<sup>8</sup>, Bernhard Wunsch<sup>9</sup>, Ron O. Dror<sup>3,10\*</sup>, Tao Che<sup>1,2\*</sup>

<sup>1</sup>Department of Anesthesiology, Washington University School of Medicine, Saint Louis, MO, USA

<sup>2</sup>Center for Clinical Pharmacology, University of Health Sciences & Pharmacy at St. Louis and Washington University School of Medicine, Saint Louis, MO, USA

<sup>3</sup>Department of Computer Science, Stanford University, Stanford, CA, USA

<sup>4</sup>Department of Pharmacology, University of North Carolina School of Medicine, Chapel Hill, NC, USA

<sup>5</sup>Present address: Department of Pharmacy, Yonsei University, Incheon, 21983, Republic of Korea

<sup>6</sup>iMolecule, Skolkovo Institute of Science and Technology, Moscow, Russia

<sup>7</sup>Research Triangle Institute, P.O. Box 12194, Research Triangle Park, NC 27709, USA

<sup>8</sup>Department of Biological Sciences, University of Southern California, Los Angeles, CA, USA

<sup>9</sup>Institut für Pharmazeutische und Medizinische Chemie, Universität Münster, Corrensstraße 48, 48149, Münster, Germany

<sup>10</sup>Departments of Molecular and Cellular Physiology and of Structural Biology, Stanford University School of Medicine, Stanford, CA, USA

## Supplementary Information

**Supplemental Figure 1.** **a.** Size-exclusion chromatography of KOR WT and computation-designed mutants. **b.** Thermostability of KOR mutants compared with the wild type. **c.** The thermostabilized mutation S324<sup>7.47</sup>C does not significantly change the function of nalfurafine. Data are expressed as the mean  $\pm$  SEM of three independent experiments (n = 3 experiments each done in duplicate). **d.** 2Fo-Fc and Fo-Fc map of nalfurafine in the binding pocket of KOR. **e.** The binding affinity of nalfurafine in the presence of Nb39 or Gi1. **f** and **g.** The effect of D138<sup>3.32</sup>A on the functional activity of nalfurafine in G protein-mediated cAMP inhibition assay and Tango arrestin recruitment assay. Data are expressed as the mean  $\pm$  SEM of three independent experiments (n = 3 experiments each done in duplicate). Values in each plot were summarized in Supplemental Table 3.

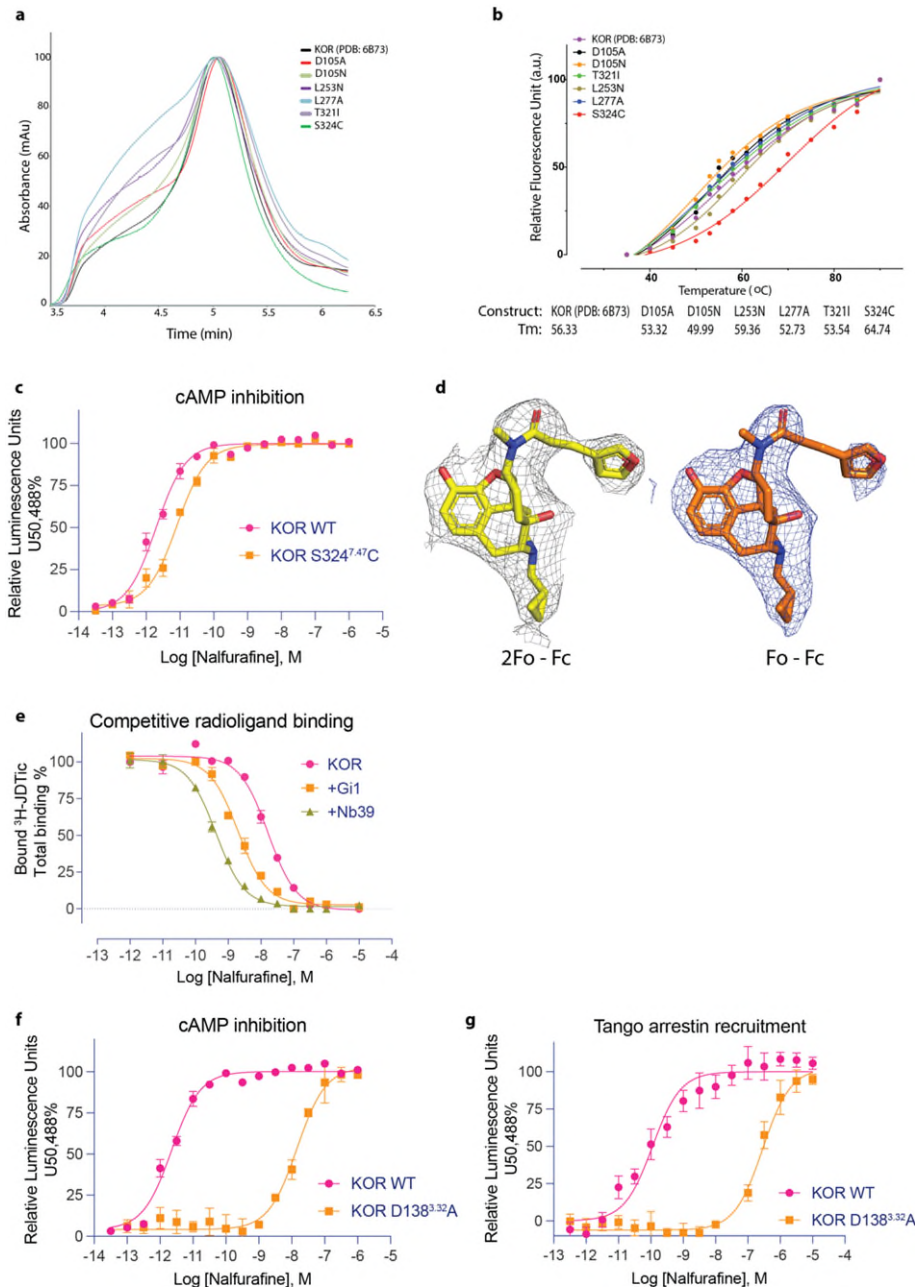

**Supplemental Figure 2. a.** The extracellular loop 2 (EL2) adopts different orientation between nalfurafine and the antagonist JD<sub>Tic</sub>. **b.** The binding pocket of JD<sub>Tic</sub>-bound KOR. **c.** The binding pocket of MP1104-bound KOR. **d.** The binding pocket of nalfurafine-bound KOR. **e.** The EL2 “lid” residues do not significantly affect the functional activity of nalfurafine. **f.** The EL2 “lid” residues accelerate the dissociation of nalfurafine from KOR. **g** and **h.** The effect of G319<sup>7.42</sup>L and Y320<sup>7.43</sup>L on the functional activity of nalfurafine in G protein-mediated cAMP inhibition assay and Tango arrestin recruitment assay. Data are expressed as the mean ± SEM of three independent experiments (n = 3 experiments each done in duplicate). Values in each plot were summarized in Supplemental Table 4.

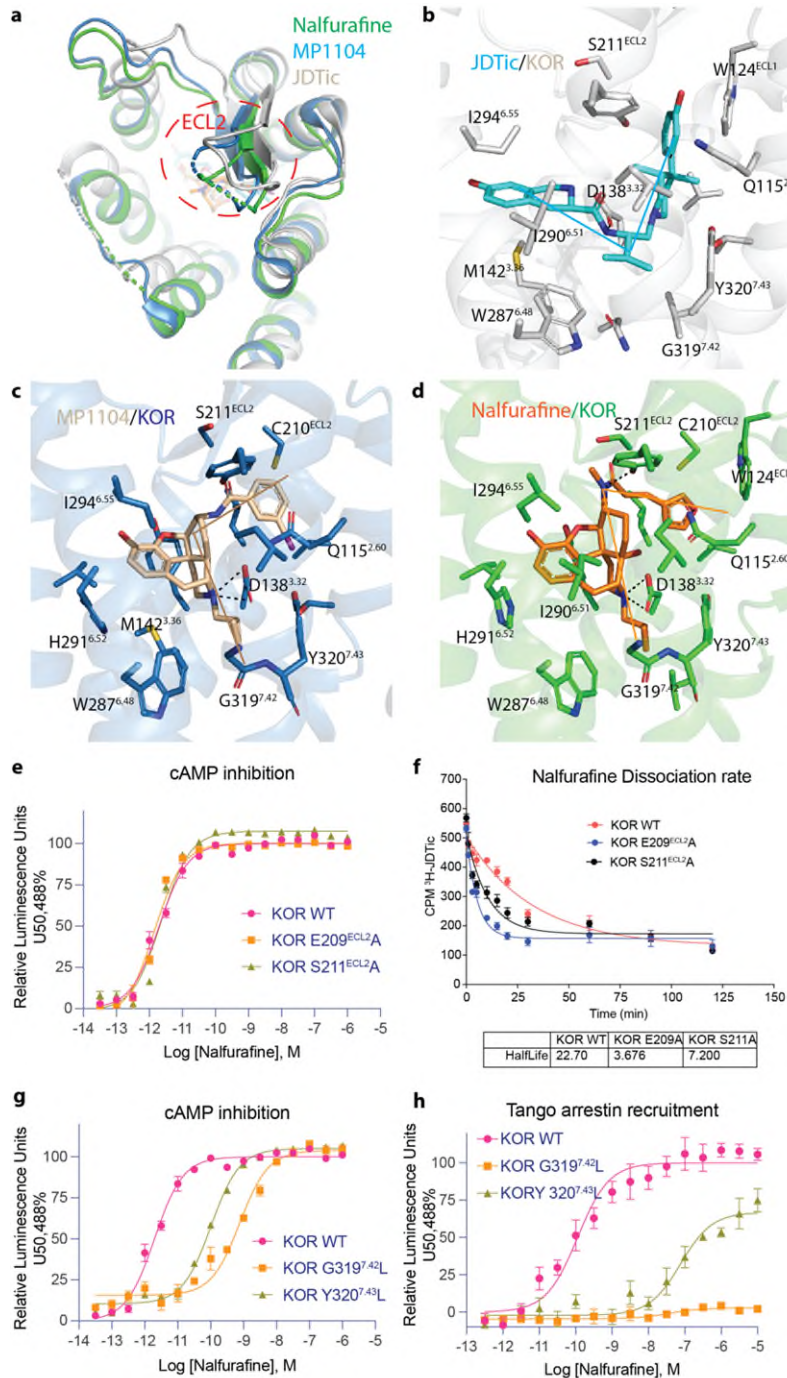

**Supplemental Figure 3. a.** The W287<sup>6.48</sup> adopts different positions upon the agonist nalfurafine and the antagonist JD1c binding. **b.** The effect of W287<sup>6.48</sup>A on the nalfurafine-mediated G protein activation and arrestin recruitment. Data are expressed as the mean  $\pm$  SEM of three independent experiments (n=3 experiments each done in duplicate). **c.** The furan ring of nalfurafine forms hydrophobic interactions with the ‘triad’ residues F114<sup>2.59</sup>/W124<sup>ECL1</sup>/V134<sup>3.28</sup>. **d.** The effects of mutations in the triad pocket, F114<sup>2.59</sup>L, W124<sup>ECL1</sup>L or V134<sup>3.28</sup>A, on the functional activity of nalfurafine in G protein-mediated cAMP inhibition assay and Tango arrestin recruitment assay. Data are expressed as the mean  $\pm$  SEM of three independent experiments (n=3 experiments each done in duplicate). Values in each plot were summarized in Supplemental Table 5.

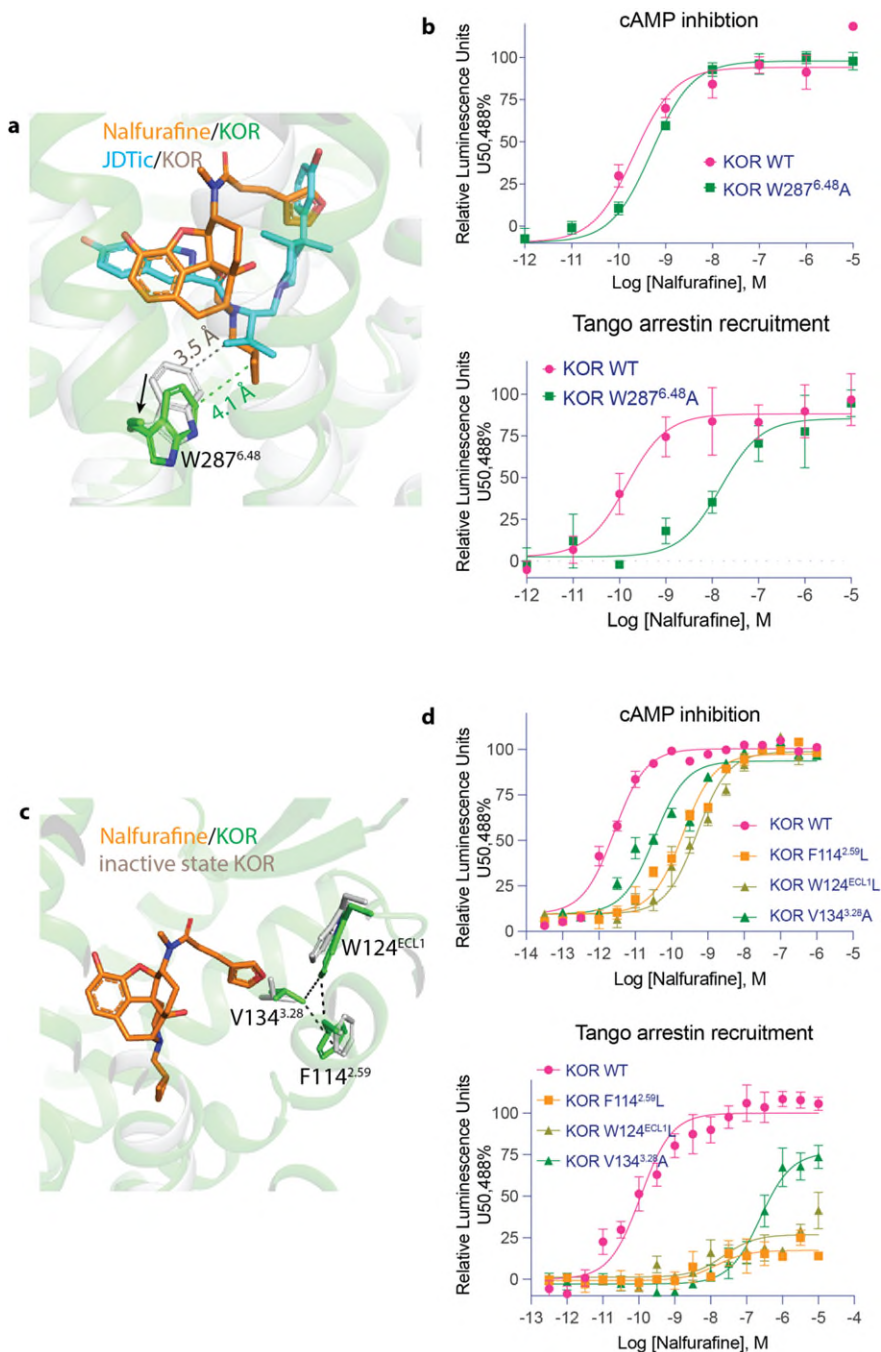

**Supplemental Figure 4.** **a.** G protein-biased activity (nalfurafine) and arrestin-biased activity (WMS-X600) confirmed by secondary BRET assays. **b.** Average ligand and binding pocket conformations in MD simulations. In cyan, the simulation frame where the ligand and binding site are most similar (lowest RMSD) to their average coordinates across all MD simulations with the indicated ligand bound. In magenta: the crystallographic pose of nalfurafine and the docked poses for U50,488 and WMS-X600, which were used to initiate the simulations. **c.** Differential effects of binding pocket residue Q115<sup>2,60</sup> mutation on the functional activity of nalfurafine and WMS-X600. **d.** Differential effects of binding pocket residue K227<sup>5,39</sup>A mutation on the functional activity of nalfurafine and WMS-X600. Data are expressed as the mean  $\pm$  SEM of three independent experiments (n = 3 experiments each done in duplicate). **e.** Disruption of the K227<sup>5,39</sup>–E297<sup>6,58</sup> salt bridge results in an increased distance between the extracellular ends of TM5 and TM6 (measured as distance between the CAs of E297<sup>6,58</sup> and F225<sup>5,37</sup>). Values in each plot were summarized in Supplemental Table 7.

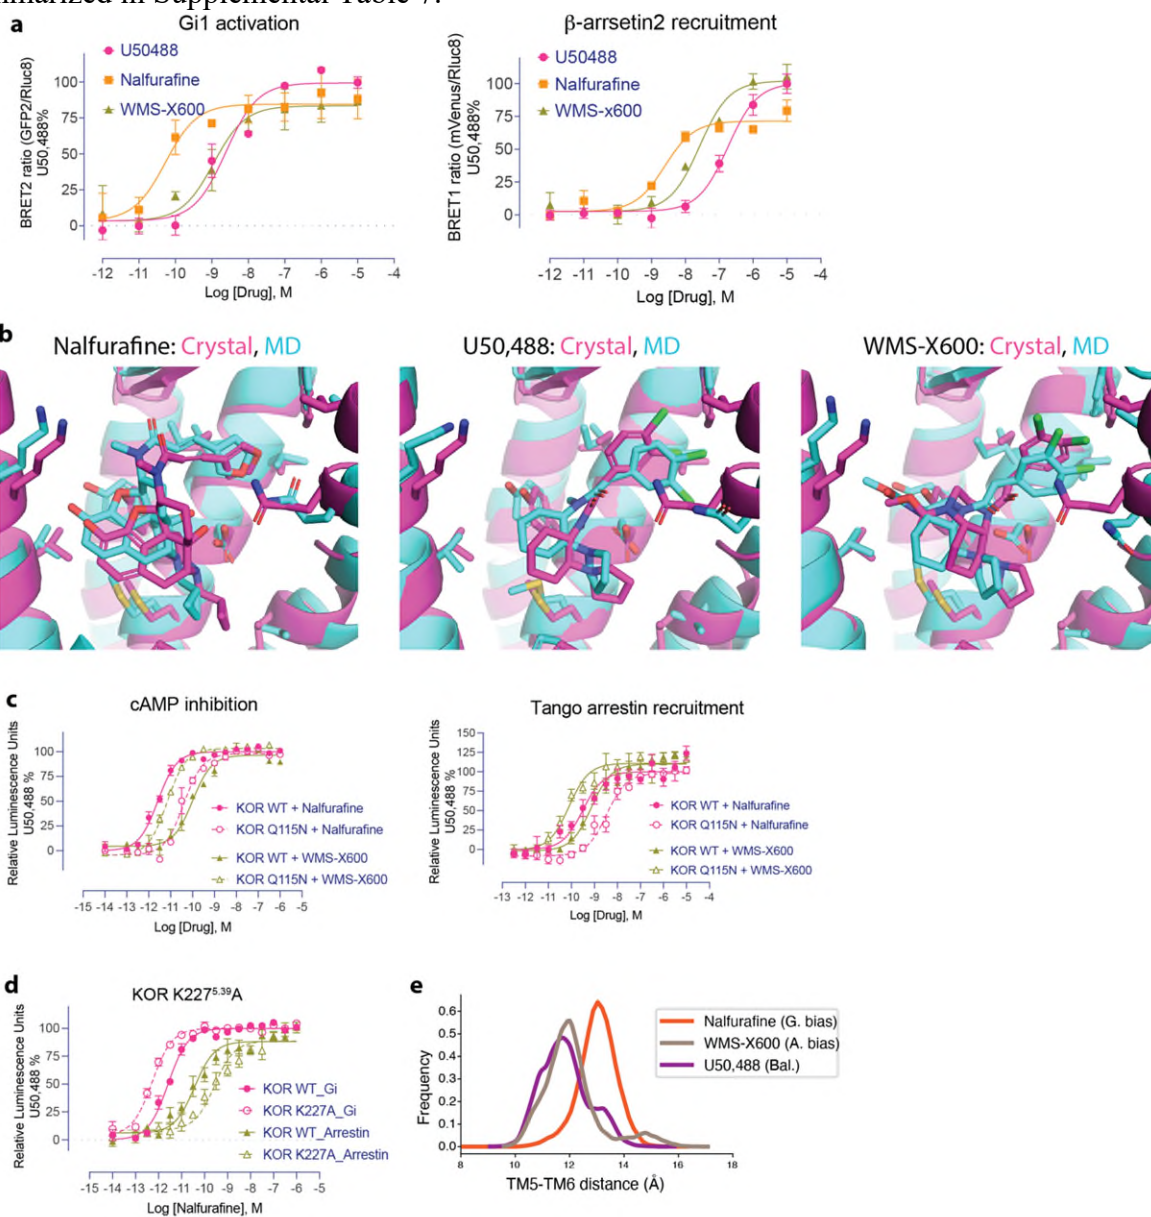

**Supplemental Figure 5.** Interaction with the ‘toggle switch’ residue W287<sup>6.48</sup> displays ligand-specific effects in signaling. **a.** Comparison of the vertical displacement of the CZ atom of W287<sup>6.48</sup> for the three ligands. **b.** Ligand-specific vertical displacement of W287<sup>6.48</sup>. **c.** The vertical displacement of W287<sup>6.48</sup> is coupled to the rotation of TM7 through the N322<sup>7.45</sup> side chain. **d** and **e.** W287<sup>6.48</sup> poses different effects on WMS-X600 (**d**) and U50,488 (**e**) mediated G protein or arrestin signaling. Data are expressed as the mean  $\pm$  SEM of three independent experiments (n = 3 experiments each done in duplicate). Values in each plot were summarized in Supplemental Table 8.

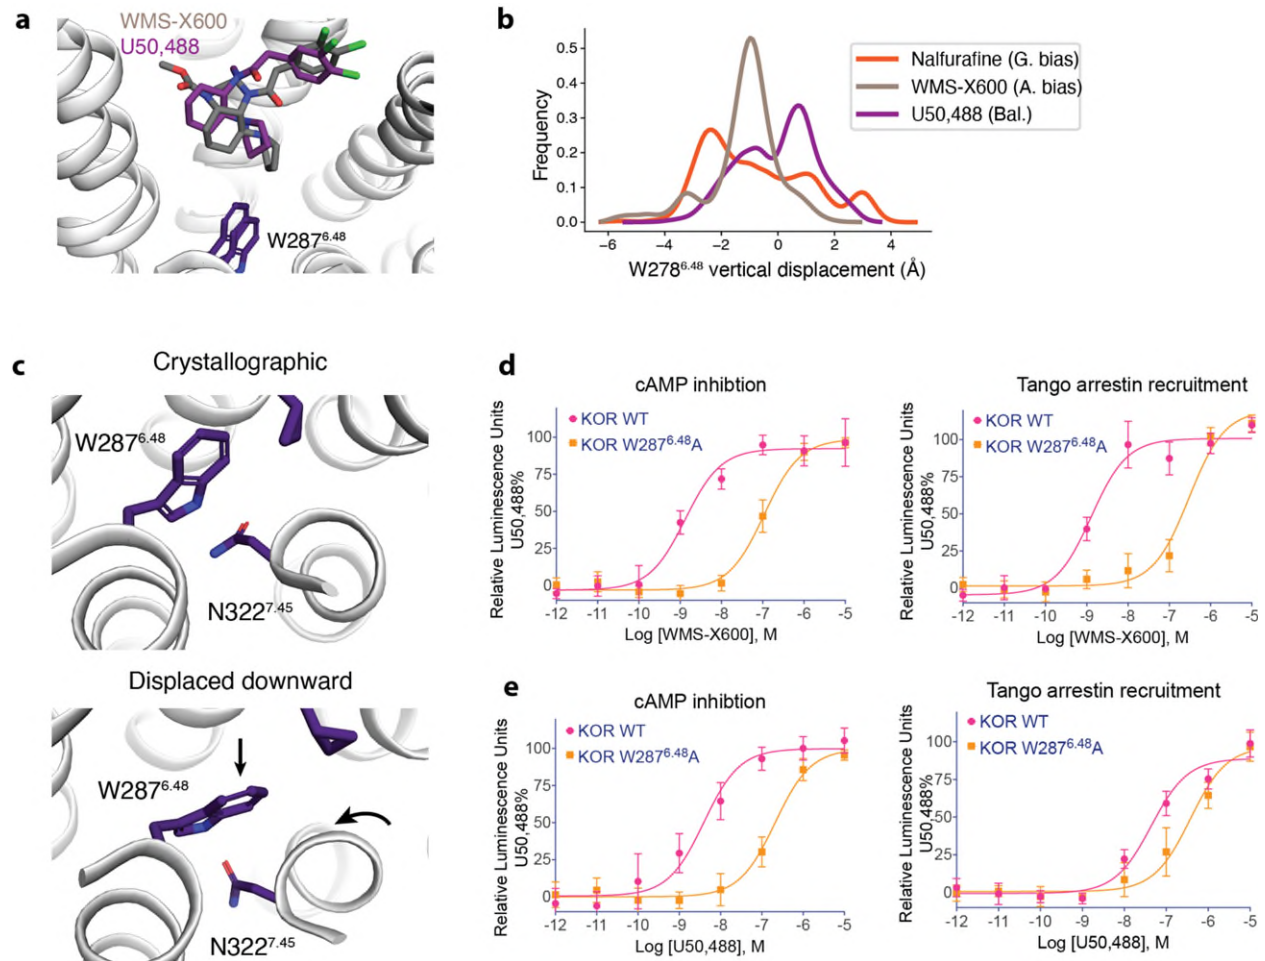

**Supplemental Figure 6. a.** MD simulation convergence analysis. Each of the left and right columns are analogous to Figure 4. The left column uses only the simulation frames from 1.5  $\mu$ s to 2.25  $\mu$ s and the right column uses only simulation frames from 2.25  $\mu$ s to 3.0  $\mu$ s. Note that our simulations are 3.0  $\mu$ s, and we drop the first 1.5  $\mu$ s to allow the simulations to converge, so this corresponds to the first and second half of the frames shown in Figure 4. The similar populations of each state in either time split suggests that the populations would not change significantly if the simulations were extended. **b.** The G protein-biased KOR agonist, 6'-GNTI, likely has a similar effect on K227<sup>5,39</sup> and induces a similar conformational state as nalfurafine does.

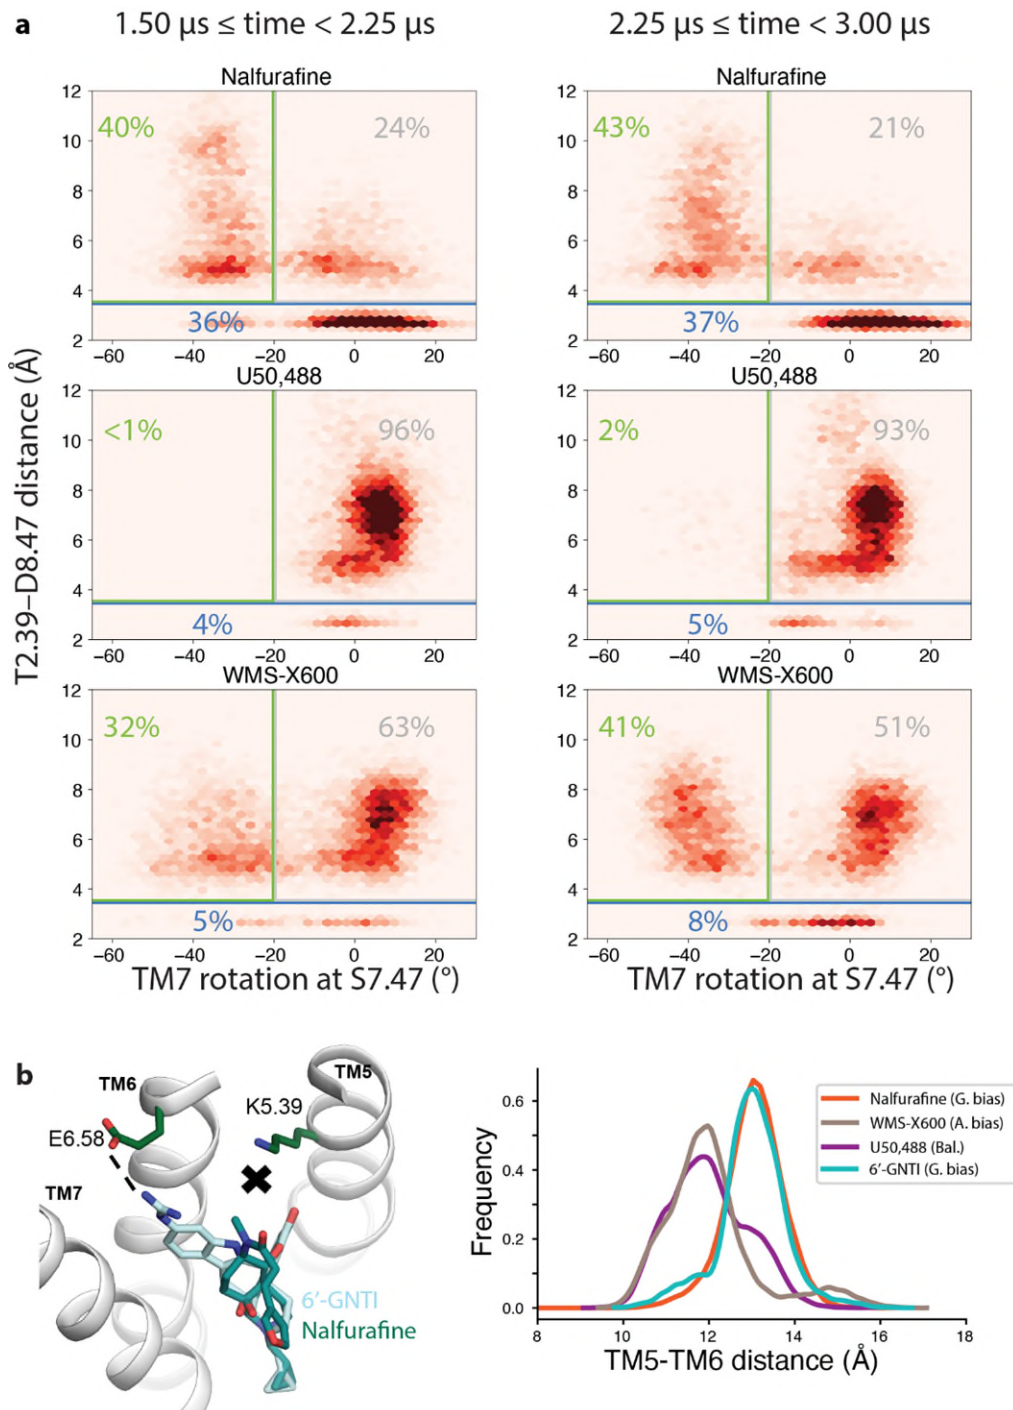

**Supplemental Figure 7.** Effects of indicated residues on the KOR-G protein subtype interactions. Data are expressed as the mean  $\pm$  SEM of three independent experiments (n = 3 experiments each done in duplicate). Values in each plot were summarized in Supplemental Table 10-11.

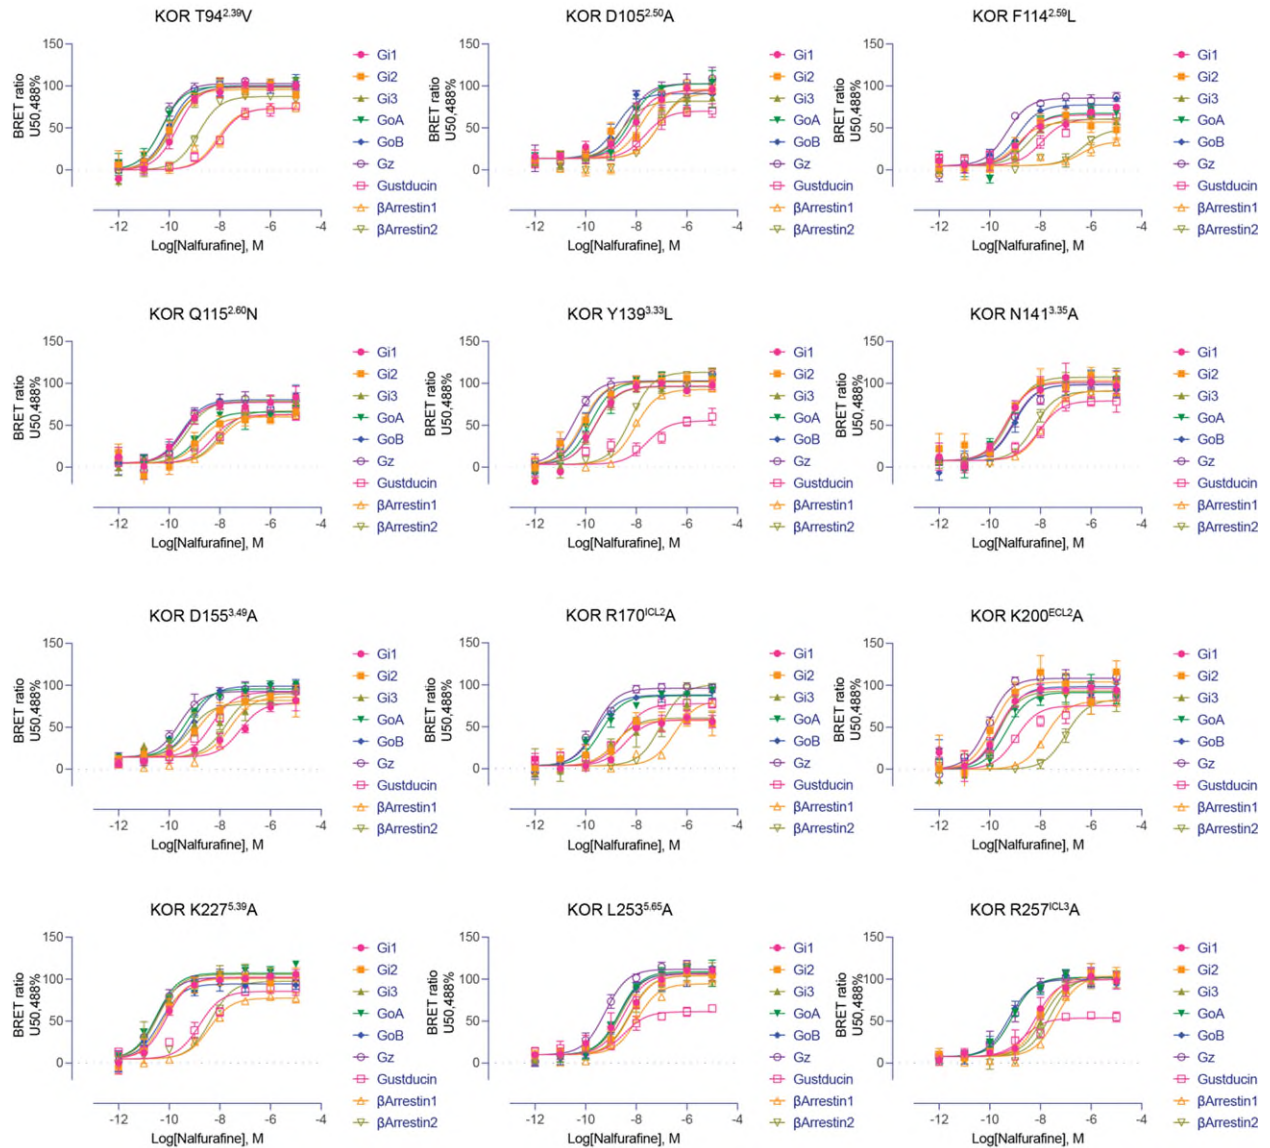



**Supplemental Figure 8.** Effects of indicated residues on the KOR-G protein subtype interactions (Con't). Data are expressed as the mean  $\pm$  SEM of three independent experiments (n=3 experiments each done in duplicate). Expression of KOR mutants were also quantitated by single-point radioligand binding assays.  $^3\text{H}$ -Diprenorphine was used at 5 nM. Values in each plot were summarized in Supplemental Table 10-11.

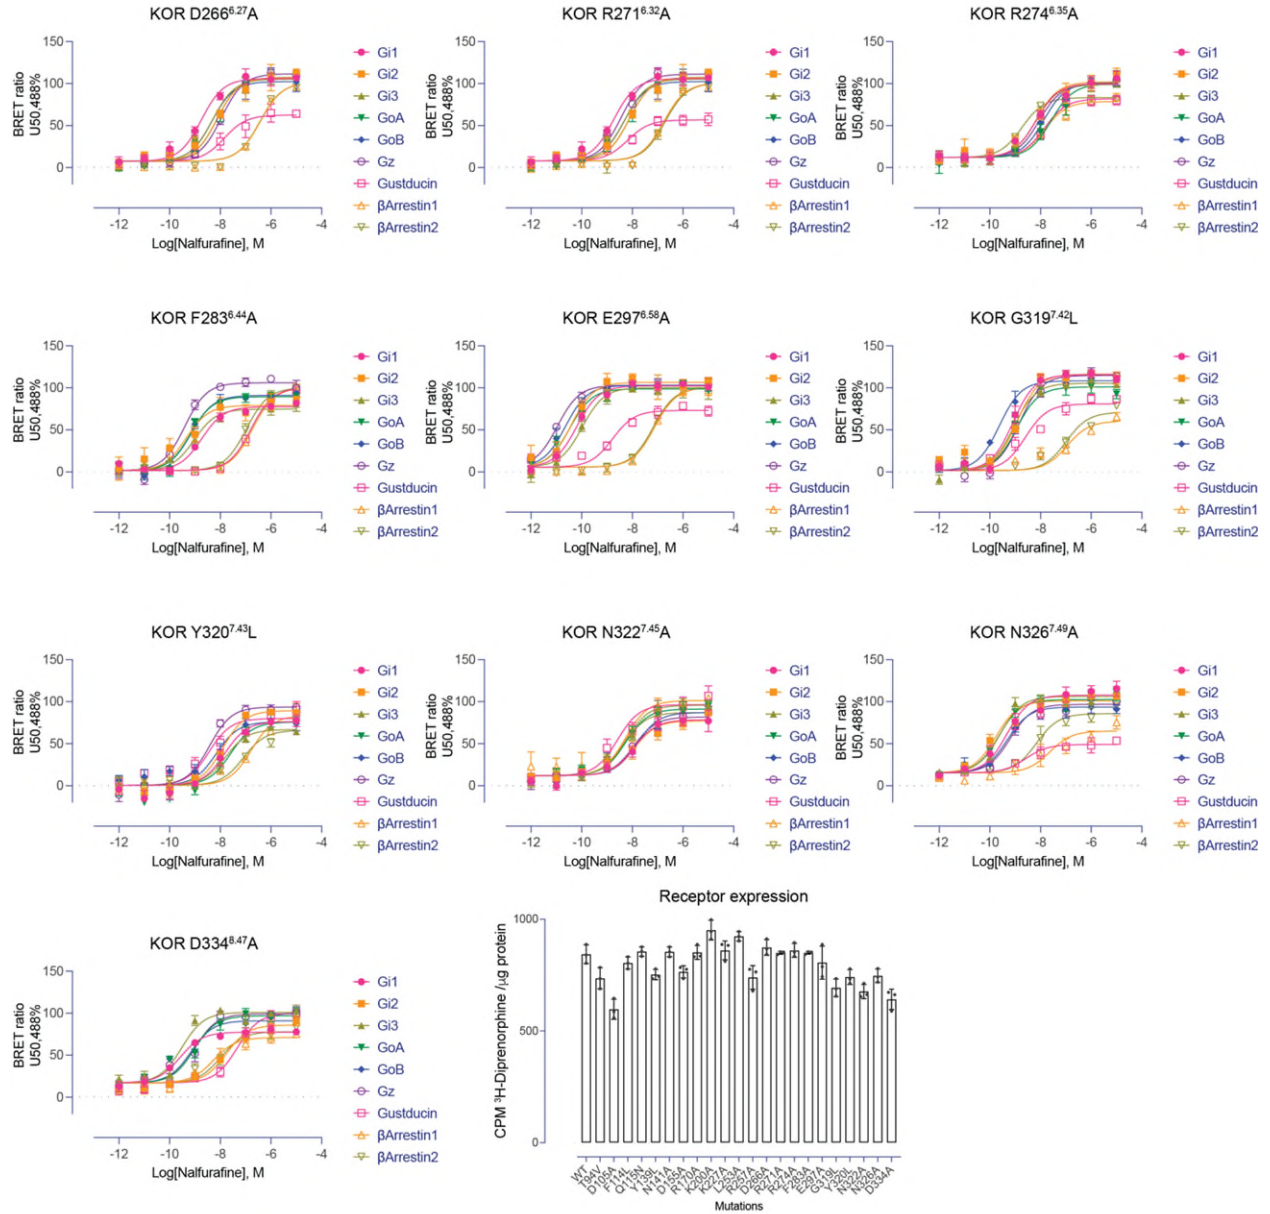

**Supplemental Figure 9.** Compatibility of the occluded state with arrestin and G protein coupling. Renderings of models of the KOR occluded state and arrestin or G protein complex modeled based on experimentally determined structures of (a) M2- $\beta$ -arrestin 1 (PDB: 6U1N), (b) NTSR1- $\beta$ -arrestin 1 (PDB: 6UP7), and (c) MOR-Gi1 (PDB: 6DDF). Models were generated by aligning an occluded state structure of KOR from a simulation frame to the receptor present in the indicated experimentally determined structure using PyMOL and then deleting the receptor from the experimentally determined complex structure.

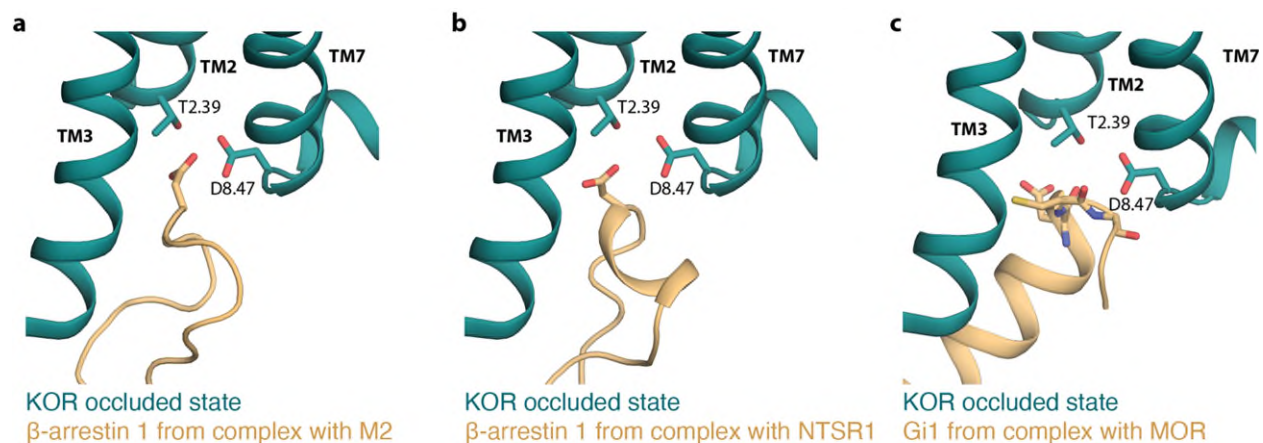

## Supplemental Tables

**Supplemental Table 1.** Data Collection and Refinement Statistics.

| Structure                                               | BRIL-KOR-Nalfurafine-Nb39                              |
|---------------------------------------------------------|--------------------------------------------------------|
| Data Collection                                         | APS, GMCA/CAT 23ID-B/D, 1.033 Å, 10-µm microfocus beam |
| Crystals                                                | 23                                                     |
| Resolution (Å)                                          | 38.38-3.30 (3.56-3.30)                                 |
| Space group                                             | P22 <sub>1</sub> 2 <sub>1</sub>                        |
| Complexes/ASU                                           | 2                                                      |
| Unit cell dimensions <i>a</i> , <i>b</i> , <i>c</i> (Å) | 70.3 76.4 161.7                                        |
| $\alpha$ , $\beta$ , $\gamma$ (°)                       | 90.0 90.0 90.0                                         |
| No. total reflections                                   | 40,881 (1,594)                                         |
| No. unique reflections                                  | 10,443 (640)                                           |
| Multiplicity                                            | 6.4 (4.4)                                              |
| Completeness (%)                                        | 94.5 (88.7)                                            |
| Mean I/ $\sigma$ (I)                                    | 5.2 (0.8)                                              |
| R <sub>merge</sub> (%)                                  | 18.2 (146.5)                                           |
| CC <sub>1/2</sub> (%)                                   | 99.4 (49.6)                                            |
| <b>Refinement Statistics</b>                            |                                                        |
| Resolution used in refinement (Å)                       | 38.26-3.30 (3.21-3.10)                                 |
| No. reflections used in refinement                      | 12,421 (1,106)                                         |
| No. reflections used for R-free                         | 1,244 (107)                                            |
| R-work (%)                                              | 27.5 (40.1)                                            |
| R-free (%)                                              | 32.6 (46.7)                                            |
| <b>Number of atoms</b>                                  |                                                        |
| KOR                                                     | 2,136                                                  |
| Nb39                                                    | 743                                                    |
| BRIL                                                    | 479                                                    |
| Nalfurafine                                             | 35                                                     |
| <b>Overall B-factors (Å<sup>2</sup>)</b>                |                                                        |
| KOR                                                     | 108.1                                                  |
| Nb39                                                    | 137.9                                                  |
| BRIL                                                    | 165.6                                                  |
| Nalfurafine                                             | 101.7                                                  |
| <b>Model Statistics</b>                                 |                                                        |
| RMSD Bond (Å)                                           | 0.011                                                  |
| RMSD Bond (°)                                           | 1.36                                                   |
| Ramachandran Favored (%) <sup>a</sup>                   | 95.1                                                   |
| Ramachandran Allowed (%) <sup>a</sup>                   | 4.9                                                    |
| Ramachandran Outliers (%) <sup>a</sup>                  | 0.0                                                    |
| Rotamer outliers (%) <sup>a</sup>                       | 0.0                                                    |
| Molprobrity score <sup>a</sup>                          | 2.13                                                   |

Highest-resolution shell is shown in parentheses.

<sup>a</sup>As defined in MolProbity.

**Supplemental Table 2** (related to Figure 1). Summary of potency and efficacy values reported in Figure 1. Potency (Log EC<sub>50</sub>, M) and efficacy (% reference receptor maximal response) are derived from simultaneous fitting of all biological replicates (n = 3 experiments each done in duplicate).

| Receptor | pK <sub>i</sub> ± SEM (radioligand binding), M |
|----------|------------------------------------------------|
| KOR      | 6.86 ± 0.12                                    |
| DOR      | 9.37 ± 0.07                                    |
| MOR      | 7.88 ± 0.07                                    |
| NOP      | N.A.                                           |

N.A. no activity

| Receptor | pEC <sub>50</sub> ± SEM (BRET-Gi1 protein activation), M |
|----------|----------------------------------------------------------|
| KOR      | 10.19 ± 0.08                                             |
| DOR      | 7.13 ± 0.24                                              |
| MOR      | 8.29 ± 0.18                                              |
| NOP      | N.A.                                                     |

N.A. no activity

**Supplemental Table 3** (Related to Supplemental Figure 1). Summary of potency and efficacy values reported in Supplemental Figure 1. Potency (Log EC<sub>50</sub>, M) and efficacy (% reference receptor maximal response) are derived from simultaneous fitting of all biological replicates (n = 3 experiments each done in duplicate).

| Mutations                 | cAMP inhibition            |                          |
|---------------------------|----------------------------|--------------------------|
|                           | pEC <sub>50</sub> ± SEM, M | E <sub>max</sub> % ± SEM |
| KOR WT                    | 11.71 ± 0.07               | 100 ± 2                  |
| KOR S324 <sup>7.47C</sup> | 11.09 ± 0.06               | 99 ± 2                   |

| Receptor   | pK <sub>i</sub> ± SEM (radioligand binding), M |
|------------|------------------------------------------------|
| KOR        | 8.63 ± 0.05                                    |
| KOR + Gi1  | 9.54 ± 0.04                                    |
| KOR + Nb39 | 10.22 ± 0.03                                   |

| Nalfurafine               | cAMP inhibition            |                          | Arrestin recruitment       |                          |
|---------------------------|----------------------------|--------------------------|----------------------------|--------------------------|
|                           | pEC <sub>50</sub> ± SEM, M | E <sub>max</sub> % ± SEM | pEC <sub>50</sub> ± SEM, M | E <sub>max</sub> % ± SEM |
| KOR WT                    | 11.65 ± 0.09               | 100 ± 3                  | 9.95 ± 0.22                | 100 ± 5                  |
| KOR D138 <sup>3.32A</sup> | 7.84 ± 0.10                | 102 ± 4                  | 6.55 ± 0.11                | 102 ± 7                  |

**Supplemental Table 4** (Related to Supplemental Figure 2). Summary of potency and efficacy values reported in Supplemental Figure 2. Potency (Log EC<sub>50</sub>, M) and efficacy (% reference receptor maximal response) are derived from simultaneous fitting of all biological replicates (n = 3 experiments each done in duplicate).

| Nalfurafine                | cAMP inhibition            |                          |
|----------------------------|----------------------------|--------------------------|
|                            | pEC <sub>50</sub> ± SEM, M | E <sub>max</sub> % ± SEM |
| KOR WT                     | 11.71 ± 0.07               | 100 ± 2                  |
| KOR E209 <sup>ECL2</sup> A | 11.84 ± 0.08               | 100 ± 2                  |
| KOR S211 <sup>ECL2</sup> A | 11.64 ± 0.09               | 107 ± 2                  |

| Nalfurafine                | cAMP inhibition            |                          | Arrestin recruitment       |                          |
|----------------------------|----------------------------|--------------------------|----------------------------|--------------------------|
|                            | pEC <sub>50</sub> ± SEM, M | E <sub>max</sub> % ± SEM | pEC <sub>50</sub> ± SEM, M | E <sub>max</sub> % ± SEM |
| KOR WT                     | 11.71 ± 0.06               | 100 ± 3                  | 9.95 ± 0.22                | 100 ± 5                  |
| KOR G319 <sup>7.42</sup> L | 9.12 ± 0.12                | 103 ± 4                  | 7.43 ± 0.31                | 2.6 ± 1.2                |
| KOR Y320 <sup>7.73</sup> L | 9.99 ± 0.06                | 105 ± 2                  | 7.11 ± 0.25                | 66 ± 7                   |

**Supplemental Table 5** (Related to Supplemental Figure 3). Summary of potency and efficacy values reported in Supplemental Figure 3. Potency (Log EC<sub>50</sub>, M) and efficacy (% reference receptor maximal response) are derived from simultaneous fitting of all biological replicates (n = 3 experiments each done in duplicate).

| Nalfurafine                | cAMP inhibition            |                          | Arrestin recruitment       |                          |
|----------------------------|----------------------------|--------------------------|----------------------------|--------------------------|
|                            | pEC <sub>50</sub> ± SEM, M | E <sub>max</sub> % ± SEM | pEC <sub>50</sub> ± SEM, M | E <sub>max</sub> % ± SEM |
| KOR WT                     | 11.32 ± 0.20               | 94 ± 2                   | 9.85 ± 0.23                | 92 ± 5                   |
| KOR W287 <sup>6.48</sup> A | 10.98 ± 0.24               | 98 ± 4                   | 7.82 ± 0.18                | 85 ± 7                   |

| Nalfurafine                | cAMP inhibition            |                          | Arrestin recruitment       |                          |
|----------------------------|----------------------------|--------------------------|----------------------------|--------------------------|
|                            | pEC <sub>50</sub> ± SEM, M | E <sub>max</sub> % ± SEM | pEC <sub>50</sub> ± SEM, M | E <sub>max</sub> % ± SEM |
| KOR WT                     | 11.57 ± 0.11               | 100 ± 3                  | 9.95 ± 0.22                | 100 ± 5                  |
| KOR F114 <sup>2.59</sup> L | 9.68 ± 0.14                | 97 ± 4                   | 7.85 ± 0.60                | 17 ± 3                   |
| KOR W124 <sup>ECL1</sup> L | 9.29 ± 0.14                | 98 ± 3                   | 7.64 ± 0.78                | 26 ± 4                   |
| KOR V134 <sup>3.28</sup> A | 10.47 ± 0.17               | 93 ± 3                   | 6.62 ± 0.12                | 76 ± 6                   |

**Supplemental Table 6** (related to Figure 3). Summary of potency and efficacy values reported in Figure 3. Potency (Log EC<sub>50</sub>, M) and efficacy (% reference receptor maximal response) are derived from simultaneous fitting of all biological replicates (n = 3 experiments each done in duplicate).

| Ligand      | cAMP inhibition            |                          | Arrestin recruitment       |                          |
|-------------|----------------------------|--------------------------|----------------------------|--------------------------|
|             | pEC <sub>50</sub> ± SEM, M | E <sub>max</sub> % ± SEM | pEC <sub>50</sub> ± SEM, M | E <sub>max</sub> % ± SEM |
| Nalfurafine | 11.52 ± 0.50               | 99 ± 2                   | 9.55 ± 0.19                | 87 ± 4                   |
| U50,488     | 9.78 ± 0.12                | 99 ± 3                   | 7.96 ± 0.51                | 100 ± 6                  |
| WMS-X600    | 9.98 ± 0.25                | 95 ± 3                   | 9.33 ± 0.16                | 96 ± 5                   |



**Supplemental Table 7** (Related to Supplemental Figure 4). Summary of potency and efficacy values reported in Supplemental Figure 4. Potency (Log EC<sub>50</sub>, M) and efficacy (% reference receptor maximal response) are derived from simultaneous fitting of all biological replicates (n = 3 experiments each done in duplicate).

| Ligand      | BRET-Gi1                   |                          | BRET-βArrestin2            |                          |
|-------------|----------------------------|--------------------------|----------------------------|--------------------------|
|             | pEC <sub>50</sub> ± SEM, M | E <sub>max</sub> % ± SEM | pEC <sub>50</sub> ± SEM, M | E <sub>max</sub> % ± SEM |
| Nalfurafine | 10.31 ± 0.36               | 85 ± 7                   | 8.59 ± 0.23                | 100 ± 4                  |
| U50,488     | 8.74 ± 0.26                | 98 ± 8                   | 6.79 ± 0.13                | 71 ± 5                   |
| WMS-X600    | 8.85 ± 0.35                | 84 ± 8                   | 7.51 ± 0.17                | 102 ± 6                  |

| Ligand      | Mutations                  | cAMP inhibition            |                          | Arrestin recruitment       |                          |
|-------------|----------------------------|----------------------------|--------------------------|----------------------------|--------------------------|
|             |                            | pEC <sub>50</sub> ± SEM, M | E <sub>max</sub> % ± SEM | pEC <sub>50</sub> ± SEM, M | E <sub>max</sub> % ± SEM |
| Nalfurafine | KOR WT                     | 11.59 ± 0.07               | 100 ± 2                  | 9.91 ± 0.21                | 100 ± 5                  |
|             | KOR Q115 <sup>2.60</sup> N | 10.41 ± 0.09               | 98 ± 3                   | 8.47 ± 0.14                | 98 ± 3                   |
| WMS-X600    | KOR WT                     | 9.99 ± 0.14                | 96 ± 3                   | 9.43 ± 0.16                | 110 ± 4                  |
|             | KOR Q115 <sup>2.60</sup> N | 11.16 ± 0.05               | 103 ± 1                  | 10.11 ± 0.17               | 110 ± 6                  |

| Ligand      | Mutations                  | cAMP inhibition            |                          | Arrestin recruitment       |                          |
|-------------|----------------------------|----------------------------|--------------------------|----------------------------|--------------------------|
|             |                            | pEC <sub>50</sub> ± SEM, M | E <sub>max</sub> % ± SEM | pEC <sub>50</sub> ± SEM, M | E <sub>max</sub> % ± SEM |
| Nalfurafine | KOR WT                     | 11.59 ± 0.07               | 100 ± 2                  | 9.91 ± 0.21                | 88 ± 4                   |
|             | KOR K227 <sup>5.39</sup> A | 12.28 ± 0.09               | 100 ± 3                  | 9.10 ± 0.14                | 89 ± 3                   |

**Supplemental Table 8** (related to Supplemental Figure 5). Summary of potency and efficacy values reported in Supplemental Figure 5. Potency (Log EC<sub>50</sub>, M) and efficacy (% reference receptor maximal response) are derived from simultaneous fitting of all biological replicates (n = 3 experiments each done in duplicate).

| WMS-X600                   | cAMP inhibition            |                          | Arrestin recruitment       |                          |
|----------------------------|----------------------------|--------------------------|----------------------------|--------------------------|
|                            | pEC <sub>50</sub> ± SEM, M | E <sub>max</sub> % ± SEM | pEC <sub>50</sub> ± SEM, M | E <sub>max</sub> % ± SEM |
| KOR WT                     | 9.88 ± 0.12                | 92 ± 4                   | 9.29 ± 0.14                | 92 ± 5                   |
| KOR W287 <sup>6.48</sup> A | 6.96 ± 0.04                | 98 ± 5                   | 6.52 ± 0.13                | 108 ± 7                  |

| U50,488                    | cAMP inhibition            |                          | Arrestin recruitment       |                          |
|----------------------------|----------------------------|--------------------------|----------------------------|--------------------------|
|                            | pEC <sub>50</sub> ± SEM, M | E <sub>max</sub> % ± SEM | pEC <sub>50</sub> ± SEM, M | E <sub>max</sub> % ± SEM |
| KOR WT                     | 9.48 ± 0.20                | 92 ± 4                   | 7.36 ± 0.12                | 88 ± 6                   |
| KOR W287 <sup>6.48</sup> A | 6.78 ± 0.31                | 98 ± 5                   | 6.42 ± 0.23                | 96 ± 9                   |

**Supplemental Table 9** (related to Figure 5a). Summary of potency and efficacy values reported in Figure 3. Potency (Log EC<sub>50</sub>, M) and efficacy (% reference receptor maximal response) are derived from simultaneous fitting of all biological replicates (n = 3 experiments each done in duplicate).

| Drug        |                            | Gαi1         | Gαi2         | Gαi3         | GαoA         | GαoB         | GαZ          | GαGust        | β-Arrestin1  | β-Arrestin2  |
|-------------|----------------------------|--------------|--------------|--------------|--------------|--------------|--------------|---------------|--------------|--------------|
| U50,488     | pEC <sub>50</sub> ± SEM, M | 8.97 ± 0.09  | 8.73 ± 0.22  | 8.71 ± 0.11  | 9.06 ± 0.16  | 9.12 ± 0.11  | 9.53 ± 0.21  | 7.22 ± 0.28   | 6.31 ± 0.07  | 6.86 ± 0.10  |
|             | E <sub>max</sub> % ± SEM   | 99.98 ± 2.42 | 99.04 ± 5.70 | 99.96 ± 2.79 | 99.98 ± 4.30 | 100.0 ± 2.69 | 100.2 ± 4.65 | 99.69 ± 11.86 | 100.0 ± 3.67 | 99.99 ± 4.55 |
| Nalfurafine | pEC <sub>50</sub> ± SEM, M | 10.26 ± 0.07 | 10.17 ± 0.11 | 10.17 ± 0.09 | 10.26 ± 0.14 | 10.63 ± 0.11 | 11.04 ± 0.13 | 8.44 ± 0.21   | 8.61 ± 0.20  | 8.96 ± 0.14  |
|             | E <sub>max</sub> % ± SEM   | 101.1 ± 1.35 | 101.3 ± 2.76 | 100.1 ± 2.01 | 98.74 ± 2.47 | 99.79 ± 1.83 | 96.68 ± 2.20 | 65.57 ± 3.99  | 52.06 ± 2.89 | 87.39 ± 3.61 |
| WMS-X600    | pEC <sub>50</sub> ± SEM, M | 9.55 ± 0.08  | 9.19 ± 0.13  | 9.19 ± 0.07  | 9.29 ± 0.10  | 9.72 ± 0.08  | 10.01 ± 0.14 | 8.31 ± 0.24   | 7.28 ± 0.08  | 8.05 ± 0.10  |
|             | E <sub>max</sub> % ± SEM   | 101.3 ± 2.02 | 99.35 ± 3.47 | 99.22 ± 1.94 | 99.81 ± 2.56 | 99.18 ± 1.93 | 97.70 ± 3.2  | 93.59 ± 7.13  | 93.8 ± 4.90  | 108.1 ± 4.70 |
| 6'-GNTI     | pEC <sub>50</sub> ± SEM, M | 9.71 ± 0.08  | 9.70 ± 0.15  | 9.50 ± 0.13  | 9.71 ± 0.13  | 10.01 ± 0.07 | 10.13 ± 0.15 | N.A.          | N.A.         | 9.72 ± 0.32  |
|             | E <sub>max</sub> % ± SEM   | 82.61 ± 1.62 | 73.62 ± 2.48 | 76.36 ± 2.49 | 79.00 ± 2.51 | 86.65 ± 1.66 | 87.90 ± 2.88 | N.A.          | N.A.         | 15.02 ± 1.56 |

N.A. no activity

**Supplemental Table 10 (Potency related to Figure 5b). FC: Fold change compared to wild type.**

| Nalfurafine<br>in KOR<br>mutation | pEC <sub>50</sub> ± SEM, M |      |              |     |              |     |              |     |              |     |              |      |             |    |             |     |             |     |
|-----------------------------------|----------------------------|------|--------------|-----|--------------|-----|--------------|-----|--------------|-----|--------------|------|-------------|----|-------------|-----|-------------|-----|
|                                   | Gai1                       |      | Gai2         |     | Gai3         |     | GaoA         |     | GaoB         |     | GαZ          |      | GαGust      |    | β-Arrestin1 |     | β-Arrestin2 |     |
|                                   |                            | FC   |              | FC  |              | FC  |              | FC  |              | FC  |              | FC   |             | FC |             | FC  |             | FC  |
| KOR WT                            | 10.26 ± 0.07               | 1    | 10.17 ± 0.11 | 1   | 10.17 ± 0.09 | 1   | 10.26 ± 0.14 | 1   | 10.63 ± 0.11 | 1   | 11.04 ± 0.13 | 1    | 8.44 ± 0.21 | 1  | 8.61 ± 0.20 | 1   | 8.96 ± 0.14 | 1   |
| T94 <sup>2.39V</sup>              | 9.69 ± 0.12                | 4    | 9.99 ± 0.11  | 2   | 9.90 ± 0.12  | 2   | 10.30 ± 0.09 | 1   | 10.01 ± 0.11 | 4   | 10.28 ± 0.11 | 6    | 8.03 ± 0.18 | 3  | 8.12 ± 0.34 | 3   | 8.85 ± 0.18 | 1   |
| D105 <sup>2.50A</sup>             | 8.12 ± 0.22                | 138  | 7.80 ± 0.21  | 234 | 8.57 ± 0.25  | 40  | 8.22 ± 0.16  | 110 | 8.79 ± 0.17  | 69  | 8.36 ± 0.19  | 479  | 7.63 ± 0.29 | 6  | 7.10 ± 0.30 | 32  | 7.06 ± 0.25 | 79  |
| F114 <sup>2.59L</sup>             | 8.71 ± 0.23                | 35   | 8.91 ± 0.20  | 18  | 8.47 ± 0.22  | 50  | 8.66 ± 0.18  | 40  | 8.90 ± 0.17  | 54  | 9.31 ± 0.24  | 54   | 7.96 ± 0.25 | 3  | 6.39 ± 0.20 | 166 | 6.32 ± 0.23 | 437 |
| Q115 <sup>2.60N</sup>             | 9.51 ± 0.19                | 6    | 8.79 ± 0.21  | 24  | 9.31 ± 0.15  | 7   | 8.88 ± 0.28  | 24  | 9.51 ± 0.19  | 13  | 9.45 ± 0.16  | 39   | 8.31 ± 0.32 | 1  | 7.99 ± 0.31 | 4   | 8.04 ± 0.21 | 8   |
| Y139 <sup>3.33L</sup>             | 9.65 ± 0.23                | 4    | 10.15 ± 0.15 | 1   | 9.63 ± 0.14  | 3   | 9.80 ± 0.09  | 3   | 10.07 ± 0.13 | 4   | 10.48 ± 0.13 | 4    | 7.70 ± 0.35 | 5  | 8.06 ± 0.18 | 4   | 8.22 ± 0.16 | 5   |
| N141 <sup>3.35A</sup>             | 9.30 ± 0.15                | 9    | 9.30 ± 0.14  | 7   | 9.19 ± 0.13  | 10  | 9.32 ± 0.15  | 9   | 9.01 ± 0.15  | 42  | 9.07 ± 0.16  | 93   | 8.05 ± 0.22 | 2  | 7.89 ± 0.23 | 5   | 8.23 ± 0.24 | 5   |
| D155 <sup>3.49A</sup>             | 7.19 ± 0.32                | 1175 | 8.87 ± 0.20  | 20  | 9.19 ± 0.28  | 10  | 9.33 ± 0.18  | 9   | 9.10 ± 0.18  | 34  | 9.61 ± 0.17  | 27   | 8.32 ± 0.21 | 1  | 7.57 ± 0.23 | 11  | 7.77 ± 0.23 | 15  |
| R170 <sup>ICL2A</sup>             | 8.44 ± 0.22                | 66   | 8.55 ± 0.25  | 42  | 8.52 ± 0.28  | 45  | 9.51 ± 0.16  | 6   | 9.74 ± 0.16  | 8   | 9.94 ± 0.14  | 13   | 8.47 ± 0.33 | 1  | 6.49 ± 0.28 | 132 | 7.02 ± 0.21 | 87  |
| K200 <sup>ECL2A</sup>             | 9.68 ± 0.20                | 4    | 9.87 ± 0.18  | 2   | 9.66 ± 0.18  | 3   | 9.34 ± 0.20  | 8   | 9.59 ± 0.20  | 11  | 10.07 ± 0.18 | 9    | 8.90 ± 0.33 | 3  | 7.79 ± 0.25 | 7   | 6.99 ± 0.28 | 93  |
| K227 <sup>5.39A</sup>             | 10.12 ± 0.12               | 1    | 10.22 ± 0.11 | 1   | 10.46 ± 0.16 | 2   | 10.52 ± 0.14 | 1   | 10.36 ± 0.14 | 2   | 10.54 ± 0.13 | 3    | 8.83 ± 0.19 | 2  | 8.42 ± 0.22 | 2   | 8.35 ± 0.19 | 4   |
| L253 <sup>5.65A</sup>             | 8.48 ± 0.19                | 60   | 8.23 ± 0.16  | 87  | 8.27 ± 0.17  | 79  | 8.67 ± 0.15  | 39  | 8.67 ± 0.17  | 91  | 9.22 ± 0.13  | 66   | 8.44 ± 0.29 | 1  | 7.96 ± 0.23 | 4   | 8.60 ± 0.19 | 2   |
| R257 <sup>ICL3A</sup>             | 8.18 ± 0.13                | 120  | 8.01 ± 0.13  | 145 | 7.90 ± 0.12  | 186 | 9.11 ± 0.12  | 14  | 9.23 ± 0.13  | 25  | 9.11 ± 0.13  | 85   | 8.68 ± 0.22 | 2  | 7.37 ± 0.17 | 17  | 7.62 ± 0.27 | 22  |
| D266 <sup>6.27A</sup>             | 8.74 ± 0.13                | 33   | 8.13 ± 0.13  | 110 | 8.31 ± 0.16  | 72  | 8.14 ± 0.13  | 132 | 8.34 ± 0.16  | 195 | 7.94 ± 0.12  | 1259 | 7.84 ± 0.26 | 4  | 6.42 ± 0.21 | 155 | 6.44 ± 0.20 | 331 |
| R271 <sup>6.32A</sup>             | 8.77 ± 0.13                | 33   | 8.16 ± 0.14  | 112 | 8.35 ± 0.17  | 74  | 8.16 ± 0.13  | 135 | 8.38 ± 0.15  | 195 | 8.49 ± 0.11  | 398  | 8.15 ± 0.36 | 2  | 6.75 ± 0.29 | 71  | 6.69 ± 0.18 | 178 |
| R274 <sup>6.35A</sup>             | 8.18 ± 0.16                | 120  | 8.16 ± 0.16  | 102 | 8.18 ± 0.15  | 98  | 7.58 ± 0.17  | 479 | 7.87 ± 0.14  | 575 | 8.05 ± 0.15  | 977  | 7.84 ± 0.14 | 4  | 8.07 ± 0.21 | 3   | 8.73 ± 0.22 | 2   |
| F283 <sup>6.44A</sup>             | 8.72 ± 0.14                | 35   | 9.34 ± 0.11  | 7   | 9.02 ± 0.16  | 14  | 9.16 ± 0.11  | 13  | 9.13 ± 0.11  | 32  | 9.40 ± 0.10  | 44   | 6.79 ± 0.11 | 45 | 6.72 ± 0.17 | 78  | 6.97 ± 0.16 | 98  |
| E297 <sup>6.58A</sup>             | 10.20 ± 0.11               | 1    | 10.41 ± 0.11 | 2   | 9.98 ± 0.12  | 2   | 10.47 ± 0.14 | 2   | 10.64 ± 0.12 | 1   | 10.96 ± 0.11 | 1    | 8.78 ± 0.18 | 2  | 7.12 ± 0.17 | 31  | 7.18 ± 0.17 | 60  |
| G319 <sup>7.42L</sup>             | 9.09 ± 0.14                | 15   | 8.94 ± 0.15  | 17  | 9.06 ± 0.17  | 13  | 8.95 ± 0.14  | 20  | 9.62 ± 0.18  | 10  | 8.83 ± 0.16  | 162  | 8.61 ± 0.23 | 1  | 6.95 ± 0.28 | 46  | 6.98 ± 0.24 | 95  |
| Y320 <sup>7.43L</sup>             | 7.82 ± 0.18                | 275  | 7.90 ± 0.15  | 186 | 7.80 ± 0.20  | 234 | 7.60 ± 0.19  | 457 | 8.16 ± 0.22  | 295 | 8.43 ± 0.14  | 407  | 8.45 ± 0.28 | 1  | 6.78 ± 0.28 | 68  | 7.08 ± 0.25 | 76  |
| N322 <sup>7.45A</sup>             | 7.93 ± 0.20                | 214  | 7.92 ± 0.24  | 178 | 8.26 ± 0.19  | 81  | 8.26 ± 0.17  | 100 | 7.82 ± 0.21  | 646 | 7.94 ± 0.20  | 1259 | 8.59 ± 0.19 | 1  | 8.27 ± 0.23 | 2   | 8.33 ± 0.25 | 4   |
| N326 <sup>7.49A</sup>             | 9.32 ± 0.15                | 9    | 9.76 ± 0.16  | 3   | 9.61 ± 0.11  | 4   | 9.65 ± 0.13  | 4   | 9.31 ± 0.14  | 21  | 9.20 ± 0.13  | 69   | 8.58 ± 0.32 | 1  | 7.63 ± 0.37 | 10  | 8.16 ± 0.27 | 6   |
| D334 <sup>8.47A</sup>             | 9.56 ± 0.20                | 5    | 7.74 ± 0.21  | 269 | 9.50 ± 0.12  | 5   | 9.00 ± 0.18  | 18  | 9.11 ± 0.24  | 33  | 8.99 ± 0.15  | 112  | 7.39 ± 0.15 | 11 | 8.23 ± 0.25 | 2   | 7.95 ± 0.33 | 10  |

**Supplemental Table 11 (Efficacy related to Figure 5b) (Con't).**

| Nalfurafine<br>in KOR<br>mutation | E <sub>max</sub> % ± SEM |                 |                 |                 |                 |                  |                  |                  |                  |
|-----------------------------------|--------------------------|-----------------|-----------------|-----------------|-----------------|------------------|------------------|------------------|------------------|
|                                   | Gαi1                     | Gαi2            | Gαi3            | GαoA            | GαoB            | GαZ              | GαGust           | β-<br>Arrestin1  | β-<br>Arrestin2  |
| KOR WT                            | 100 ±<br>3.24            | 101 ±<br>2.92   | 99.93 ±<br>2.37 | 98.31 ±<br>3.11 | 99.55 ±<br>1.99 | 96.48 ±<br>2.47  | 65.57 ±<br>3.99  | 52.03 ±<br>2.94  | 87.39 ±<br>3.61  |
| T94 <sup>2.39</sup> V             | 99.23 ±<br>3.20          | 95.8 ±<br>3.11  | 98.21 ±<br>3.14 | 99.67 ±<br>3.03 | 100.5 ±<br>2.62 | 102 ±<br>3.02    | 73.58 ±<br>4.22  | 73.23 ±<br>6.19  | 87.51 ±<br>5.03  |
| D105 <sup>2.50</sup> A            | 94.34 ±<br>5.36          | 96.07 ±<br>5.72 | 81.72 ±<br>4.87 | 102.5 ±<br>5.10 | 91.01 ±<br>4.55 | 102.8 ±<br>5.07  | 70.15 ±<br>5.77  | 91.64 ±<br>9.45  | 95.38 ±<br>9.42  |
| F114 <sup>2.59</sup> L            | 65.55 ±<br>3.91          | 56.89 ±<br>3.65 | 60.33 ±<br>3.97 | 67.41 ±<br>3.81 | 77.46 ±<br>3.74 | 85.56 ±<br>3.49  | 60.6 ±<br>4.59   | 33.89 ±<br>9.96  | 48.7 ±<br>10.22  |
| Q115 <sup>2.60</sup> N            | 77.33 ±<br>3.76          | 59.98 ±<br>4.08 | 78.71 ±<br>3.80 | 65.77 ±<br>4.01 | 80.49 ±<br>3.77 | 78.65 ±<br>3.72  | 62.9 ±<br>4.80   | 62.25 ±<br>6.61  | 67.02 ±<br>6.68  |
| Y139 <sup>3.33</sup> L            | 96.72 ±<br>3.66          | 101.7 ±<br>3.49 | 95.97 ±<br>3.69 | 101.9 ±<br>3.62 | 102.4 ±<br>3.50 | 102.8 ±<br>3.29  | 55.31 ±<br>6.35  | 92.81 ±<br>6.53  | 113.3 ±<br>6.40  |
| N141 <sup>3.35</sup> A            | 100.9 ±<br>3.98          | 103.1 ±<br>4.04 | 107.4 ±<br>4.10 | 101.1 ±<br>4.03 | 98.71 ±<br>4.17 | 98.3 ±<br>4.18   | 79.1 ±<br>5.00   | 91.26 ±<br>7.09  | 90.62 ±<br>6.65  |
| D155 <sup>3.49</sup> A            | 79.07 ±<br>6.38          | 82.03 ±<br>4.00 | 77.84 ±<br>4.04 | 95.68 ±<br>3.84 | 99.05 ±<br>3.97 | 92.73 ±<br>3.62  | 91.82 ±<br>4.58  | 86.45 ±<br>6.93  | 90.18 ±<br>6.73  |
| R170 <sup>ICL2</sup> A            | 58.67 ±<br>4.37          | 57.62 ±<br>4.12 | 60.3 ±<br>4.30  | 86.94 ±<br>4.00 | 87.79 ±<br>3.81 | 95.95 ±<br>3.82  | 77.48 ±<br>4.54  | 81.8 ±<br>10.44  | 100.4 ± 8.6      |
| K200 <sup>ECL2</sup> A            | 96.13 ±<br>5.54          | 103.7 ±<br>5.37 | 93.07 ±<br>5.46 | 91.42 ±<br>5.72 | 98.32 ±<br>5.59 | 108.3 ±<br>5.30  | 75.72 ±<br>6.34  | 81.34 ±<br>10.47 | 83.17 ±<br>12.86 |
| K227 <sup>5.39</sup> A            | 102.2 ±<br>3.22          | 100.6 ±<br>3.16 | 105.6 ±<br>3.10 | 107.3 ±<br>3.20 | 94.35 ±<br>3.17 | 102.2 ±<br>3.12  | 85.50 ±<br>±4.01 | 77.46 ±<br>5.85  | 97.55 ±<br>5.96  |
| L253 <sup>5.65</sup> A            | 106.1 ±<br>4.2           | 104.6 ±<br>4.20 | 104.4 ±<br>4.30 | 109 ±<br>3.80   | 106.8 ±<br>3.80 | 111.9 ±<br>3.60  | 61.36 ±<br>4.02  | 94.50 ±<br>6.19  | 107.40 ±<br>5.40 |
| R257 <sup>ICL3</sup> A            | 99.49 ±<br>3.87          | 103.5 ±<br>4.04 | 100 ±<br>4.08   | 102.2 ±<br>3.32 | 99.60 ±<br>3.31 | 101.6 ±<br>3.39  | 53.79 ±<br>3.91  | 103.2 ±<br>6.52  | 103.2 ±<br>6.02  |
| D266 <sup>6.27</sup> A            | 106 ±<br>3.80            | 107.3 ±<br>4.20 | 105.2 ±<br>4.30 | 107.6 ±<br>4.30 | 102.4 ±<br>4.18 | 111.7 ±<br>4.30  | 62.59 ±<br>4.53  | 101.5 ±<br>9.54  | 101.3 ±<br>9.39  |
| R271 <sup>6.32</sup> A            | 105 ±<br>3.70            | 106.4 ±<br>4.20 | 103.3 ±<br>4.20 | 106.7 ±<br>4.20 | 101.5 ±<br>4.12 | 110.2 ±<br>4.00  | 56.9 ±<br>4.24   | 100.9 ±<br>8.05  | 101 ± 8.20       |
| R274 <sup>6.35</sup> A            | 100.1 ±<br>4.05          | 102 ±<br>±4.03  | 98.85 ±<br>3.93 | 99.55 ±<br>4.64 | 101.2 ±<br>4.19 | 99.13 ±<br>±4.01 | 81.96 ±<br>4.08  | 78.68 ±<br>6.01  | 83.35 ±<br>4.94  |
| F283 <sup>6.44</sup> A            | 77.61 ±<br>3.32          | 79.03 ±<br>3.30 | 74.75 ±<br>3.23 | 89.50 ±<br>3.09 | 91.02 ±<br>3.10 | 106 ±<br>3.00    | 100.2 ±<br>5.19  | 100.2 ±<br>7.42  | 100.2 ±<br>6.90  |
| E297 <sup>6.58</sup> A            | 102.4 ±<br>2.80          | 106.5 ±<br>2.80 | 100.2 ±<br>2.83 | 98.88 ±<br>2.80 | 103 ±<br>2.70   | 103.1 ±<br>2.60  | 73.14 ±<br>3.44  | 100.6 ±<br>6.72  | 100.7 ±<br>6.68  |
| G319 <sup>7.42</sup> L            | 115.7 ±<br>5.00          | 116.3 ±<br>5.10 | 105.5 ±<br>5.10 | 101.1 ±<br>5.05 | 108.3 ±<br>4.70 | 114.8 ±<br>5.20  | 80.92 ±<br>5.98  | 60.42 ±<br>13.31 | 70.99 ±<br>11.83 |
| Y320 <sup>7.43</sup> L            | 76.32 ±<br>5.02          | 89.34 ±<br>4.92 | 66.88 ±<br>5.05 | 75.75 ±<br>5.28 | 75.99 ±<br>4.86 | 93.72 ±<br>4.43  | 80.02 ±<br>4.94  | 83.58 ±<br>9.96  | 65.94 ±<br>9.47  |
| N322 <sup>7.45</sup> A            | 78.39 ±<br>4.48          | 77.25 ±<br>4.67 | 95.77 ±<br>4.40 | 91.34 ±<br>4.28 | 87.11 ±<br>4.80 | 81.81 ±<br>4.55  | 96.59 ±<br>4.21  | 101.3 ±<br>6.13  | 87.09 ±<br>5.91  |
| N326 <sup>7.49</sup> A            | 107.8 ±<br>3.40          | 101 ±<br>3.19   | 106.2 ±<br>3.20 | 102.6 ±<br>3.19 | 93.63 ±<br>3.31 | 96.86 ±<br>3.36  | 49.16 ±<br>3.77  | 65.16 ±<br>6.76  | 85.75 ±<br>5.71  |
| D334 <sup>8.47</sup> A            | 77.45 ±<br>3.23          | 86.08 ±<br>4.41 | 101 ±<br>3.16   | 96.92 ±<br>3.62 | 91.10 ±<br>3.75 | 99.23 ±<br>3.52  | 100.1 ±<br>4.86  | 71.06 ±<br>5.64  | 78.02 ±<br>6.04  |
