# Supplementary material for: Molecular mechanism of biased signaling at the kappa opioid receptor
Source: PubMed Central journal article supplement (PMC10008561; doi:10.1038/s41467-023-37041-7), 2023-03-11
Supplement: 41467_2023_37041_MOESM3_ESM.pdf [file 41467_2023_37041_MOESM3_ESM.pdf]

## Reporting Summary

Nature Research wishes to improve the reproducibility of the work that we publish. This form provides structure for consistency and transparency in reporting. For further information on Nature Research policies, see [Authors & Referees](#) and the [Editorial Policy Checklist](#).

### Statistics

For all statistical analyses, confirm that the following items are present in the figure legend, table legend, main text, or Methods section.

- |     |           |
|-----|-----------|
| n/a | Confirmed |
|-----|-----------|
- The exact sample size ( $n$ ) for each experimental group/condition, given as a discrete number and unit of measurement
  - A statement on whether measurements were taken from distinct samples or whether the same sample was measured repeatedly
  - The statistical test(s) used AND whether they are one- or two-sided  
*Only common tests should be described solely by name; describe more complex techniques in the Methods section.*
  - A description of all covariates tested
  - A description of any assumptions or corrections, such as tests of normality and adjustment for multiple comparisons
  - A full description of the statistical parameters including central tendency (e.g. means) or other basic estimates (e.g. regression coefficient) AND variation (e.g. standard deviation) or associated estimates of uncertainty (e.g. confidence intervals)
  - For null hypothesis testing, the test statistic (e.g.  $F$ ,  $t$ ,  $r$ ) with confidence intervals, effect sizes, degrees of freedom and  $P$  value noted  
*Give  $P$  values as exact values whenever suitable.*
  - For Bayesian analysis, information on the choice of priors and Markov chain Monte Carlo settings
  - For hierarchical and complex designs, identification of the appropriate level for tests and full reporting of outcomes
  - Estimates of effect sizes (e.g. Cohen's  $d$ , Pearson's  $r$ ), indicating how they were calculated

*Our web collection on [statistics for biologists](#) contains articles on many of the points above.*

### Software and code

Policy information about [availability of computer code](#)

Data collection

Advanced Photon Source (23ID-B/D) at Argonne National Laboratory

Data analysis

Structure determination and refinement:  
HKL2000, USCF Chimera 1.14, MolProbity (via phenix 1.19.2), eLBOW (via Phenix), Phenix 1.19.2, Coot 0.9.5, Pymol 2.5.3  
Functional data analysis: GraphPad 9.0  
Ligand illustrator: ChemDraw 20.0  
molecular dynamics simulations: CHARMM-36M (<https://www.charmm-gui.org/>), AMBER v18 (including CUD and PMEMD), Visual Molecular Dynamics (VMD) v1.9.4a48

For manuscripts utilizing custom algorithms or software that are central to the research but not yet described in published literature, software must be made available to editors/reviewers. We strongly encourage code deposition in a community repository (e.g. GitHub). See the Nature Research [guidelines for submitting code & software](#) for further information.

### Data

Policy information about [availability of data](#)

All manuscripts must include a [data availability statement](#). This statement should provide the following information, where applicable:

- Accession codes, unique identifiers, or web links for publicly available datasets
- A list of figures that have associated raw data
- A description of any restrictions on data availability

Macromolecular structure data have been deposited to the worldwide protein data bank (wwPDB) with accession code 7YIT.

Published PDB files used in this study: KOR-JDTic (4DJH), KOR-MP1104-Nb39 (6B73), MOR-BU72-Nb39 (5C1M), MOR-DAMGO-Gi1 (6DDF), M2R-beta-arrestin1 (6U1N), NTS1R-beta-arrestin1 (6UP7).

Generated and analyzed data sets that support the findings of this study are available as source data.

## Field-specific reporting

Please select the one below that is the best fit for your research. If you are not sure, read the appropriate sections before making your selection.

- Life sciences       Behavioural & social sciences       Ecological, evolutionary & environmental sciences

For a reference copy of the document with all sections, see [nature.com/documents/nr-reporting-summary-flat.pdf](https://www.nature.com/documents/nr-reporting-summary-flat.pdf)

## Life sciences study design

All studies must disclose on these points even when the disclosure is negative.

|                 |                                                                                                                                                                                                                                                                                                                                                                                                                                                                                                                                                                                            |
|-----------------|--------------------------------------------------------------------------------------------------------------------------------------------------------------------------------------------------------------------------------------------------------------------------------------------------------------------------------------------------------------------------------------------------------------------------------------------------------------------------------------------------------------------------------------------------------------------------------------------|
| Sample size     | Number of technical replicates and biological replicates are reported in the figure legends. Sample size was determined based on variability of the response deviating from the mean as indicated by the standard error of the mean (SEM), which is also represented in the figures. Typically, at least three biological replicates were performed so that the SEM was within at least 20% of the mean, but exact number of replicates are indicated per result in figure legends.<br>To process the diffraction data, number of crystals and frames are shown in the statistic Table S1. |
| Data exclusions | No data were excluded for this study.                                                                                                                                                                                                                                                                                                                                                                                                                                                                                                                                                      |
| Replication     | For BRET, split-luciferase based cAMP reporter assay, and radioligand binding assays, at least three biologically independent experiments (n=3) were performed. Exact number of biological replicates are reported in the figure legends. All the experimental findings were reliably reproduced.                                                                                                                                                                                                                                                                                          |
| Randomization   | No Randomization was attempted as the assays don't have unknown covariates. For example, the comparison between wt KOR and mutant KOR in the signaling studies, there is no feasible unknown covariate that we can minimize by randomizing the experimental groups.                                                                                                                                                                                                                                                                                                                        |
| Blinding        | No blinding was performed in this study. For both X-Ray structure determination and functional studies, blinding is not necessary due to the nature of these experiments do not requires subject assessment of the data that may influence the validity of the results                                                                                                                                                                                                                                                                                                                     |

## Reporting for specific materials, systems and methods

We require information from authors about some types of materials, experimental systems and methods used in many studies. Here, indicate whether each material, system or method listed is relevant to your study. If you are not sure if a list item applies to your research, read the appropriate section before selecting a response.

### Materials & experimental systems

|                                     |                                                           |
|-------------------------------------|-----------------------------------------------------------|
| n/a                                 | Included in the study                                     |
| <input checked="" type="checkbox"/> | <input type="checkbox"/> Antibodies                       |
| <input type="checkbox"/>            | <input checked="" type="checkbox"/> Eukaryotic cell lines |
| <input checked="" type="checkbox"/> | <input type="checkbox"/> Palaeontology                    |
| <input checked="" type="checkbox"/> | <input type="checkbox"/> Animals and other organisms      |
| <input checked="" type="checkbox"/> | <input type="checkbox"/> Human research participants      |
| <input checked="" type="checkbox"/> | <input type="checkbox"/> Clinical data                    |

### Methods

|                                     |                                                 |
|-------------------------------------|-------------------------------------------------|
| n/a                                 | Included in the study                           |
| <input checked="" type="checkbox"/> | <input type="checkbox"/> ChIP-seq               |
| <input checked="" type="checkbox"/> | <input type="checkbox"/> Flow cytometry         |
| <input checked="" type="checkbox"/> | <input type="checkbox"/> MRI-based neuroimaging |

## Eukaryotic cell lines

Policy information about [cell lines](#)

|                                                                   |                                                                                                                                                                                                                                                                                                                                                                                                                                 |
|-------------------------------------------------------------------|---------------------------------------------------------------------------------------------------------------------------------------------------------------------------------------------------------------------------------------------------------------------------------------------------------------------------------------------------------------------------------------------------------------------------------|
| Cell line source(s)                                               | Source for HEK293T cell line is ATCC. HTLA cell lines are derived from Dr. Richard Axel's lab. Spodoptera frugiperda (Sf9) cells are from Expression Systems (#94-001S).                                                                                                                                                                                                                                                        |
| Authentication                                                    | All cells used in this study are commercial and were obtained from vendors as indicated in the manuscript. HEK293T were certified by ATCC using morphology and growth characteristics, and STR profiling. HTLA cell lines were derived from Dr. Richard Axel's lab. Sf9 cells are commercial and obtained from vendors as indicated in the manuscript. No additional authentication was performed by the authors of this study. |
| Mycoplasma contamination                                          | Cell lines were certified as mycoplasma-free as they were obtained from the source companies and labs. See Methods for sources. Sf9 cell line was certified as mycoplasma-free by the source company.                                                                                                                                                                                                                           |
| Commonly misidentified lines (See <a href="#">ICLAC</a> register) | No commonly misidentified cell lines were used.                                                                                                                                                                                                                                                                                                                                                                                 |
